# Supplementary material for: Mussel-inspired adhesive gelatin–polyacrylamide hydrogel wound dressing loaded with tetracycline hydrochloride to enhance complete skin regeneration
Source: Royal Society of Chemistry journal article supplement (doi:10.1039/d1sm01373d), 2021-12-22
Supplement: d1sm01373d1.pdf [file d1sm01373d1.pdf]

1

## Supporting Information

### 2 **Mussel-inspired adhesive gelatin-polyacrylamide hydrogel wound** 3 **dressing loaded with tetracycline hydrochloride to enhance complete** 4 **skin regeneration**

5 Yamei Wang<sup>a</sup>, Dongdong Xiao<sup>b, c</sup>, Lin Quan<sup>a</sup>, Hongbin Chai<sup>a</sup>, Xiaofeng Sui<sup>a</sup>, Bijia  
6 Wang<sup>a</sup>, Hong Xu<sup>a\*</sup>, Zhiping Mao<sup>a\*</sup>

7 <sup>a</sup>Key Lab of Science and Technology of Eco-textile, Ministry of Education, College of  
8 Chemistry, Chemical Engineering and Biotechnology, Innovation Center for Textile  
9 Science and Technology, Donghua University, No. 2999 North Renmin Road,  
10 Shanghai 201620, China

11 <sup>b</sup> Department of Urology and Andrology, Ren Ji Hospital, School of Medicine,  
12 Shanghai Jiao Tong University, Shanghai 200001, China

13 <sup>c</sup> Shanghai Key Laboratory of Tissue Engineering, Shanghai Ninth People's Hospital,  
14 School of Medicine, Shanghai Jiao Tong University, Shanghai 200011, China

15

#### 16 **\* Corresponding author**

17 Hong Xu, Zhiping Mao.

18 Key Lab of Science and Technology of Eco-textile, Ministry of Education, College of  
19 Chemistry, Chemical Engineering and Biotechnology, Innovation Center for Textile  
20 Science and Technology, Donghua University, No. 2999 North Renmin Road,  
21 Shanghai 201620, China

22 Tel: +86-21-67792720; Fax: +86-21-67792707;

23 E-mail addresses: hxu@dhu.edu.cn, zhpmiao@dhu.edu.cn

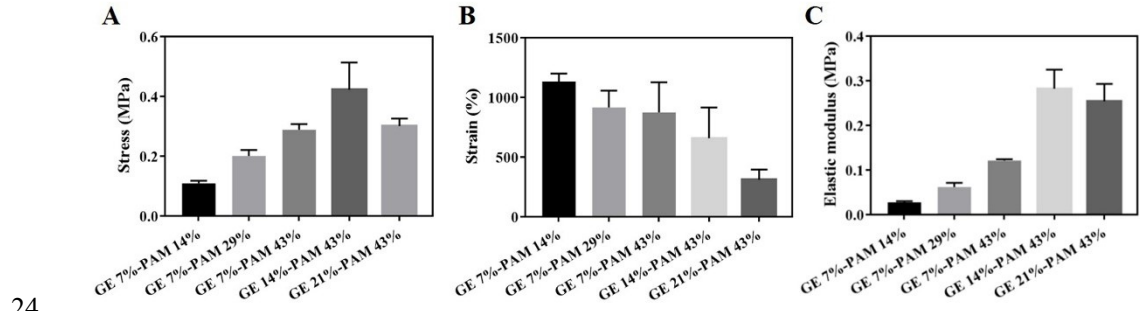

24  
 25 **Fig. S1.** Mechanical properties of hydrogels with different weight ratio of GE/DI and AM/DI.  
 26 (A) Fracture stress, (B) fracture strain, and (C) elastic modulus of hydrogels.

27

28 **Table S1. Mechanical properties of hydrogels with different weight ratio of GE/DI and**  
 29 **AM/DI**

| Bond assignments      | GE 7%-PAM 14% | GE 7%-PAM 29% | GE 7%-PAM 43% | GE 14%-PAM 43% | GE 21%-PAM 43% |
|-----------------------|---------------|---------------|---------------|----------------|----------------|
| Fracture stress (MPa) | 0.11 ± 0.01   | 0.2 ± 0.02    | 0.29 ± 0.02   | 0.42 ± 0.09    | 0.3 ± 0.02     |
| Fracture strain (%)   | 1133 ± 66.15  | 915.9 ± 140.9 | 874.4 ± 252.7 | 658.3 ± 257.3  | 310.5 ± 85.5   |
| Elastic modulus (MPa) | 0.028 ± 0.003 | 0.062 ± 0.009 | 0.121 ± 0.003 | 0.282 ± 0.043  | 0.254 ± 0.039  |

30

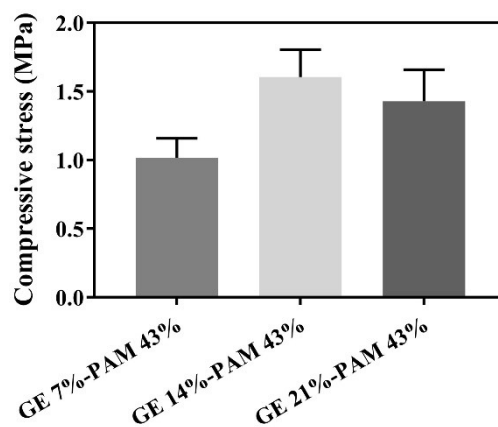

31 **Fig. S2.** Compressive stress of hydrogels with different weight ratio of GE/DI (AM/DI=43%).

32

33 **Table S2. Compressive stress of hydrogels with different weight ratio of GE/DI**

34 (AM/DI=43%)

---

| Name                     | GE 7%-PAM 43% | GE 14%-PAM 43% | GE 21%-PAM 43% |
|--------------------------|---------------|----------------|----------------|
| Compressive stress (MPa) | 1.02 ± 0.14   | 1.61 ± 0.2     | 1.43 ± 0.23    |

---

35
